# Supplementary material for: Understanding diagnosis and management of dementia and guideline implementation in general practice: a qualitative study using the theoretical domains framework
Source: Implement Sci. 2014 Mar 3;9:31. doi: 10.1186/1748-5908-9-31 (PMC4015883; doi:10.1186/1748-5908-9-31)
Supplement: Additional file 2 — Barriers and enablers to other recommended behaviours elicited in interviews. This file includes the barriers and enablers to other recommended behaviours elicited in interviews. [file 1748-5908-9-31-S2.pdf]

**Additional file 2. Barriers and enablers to other recommended behaviours elicited in interviews**

| <b>Clinical behaviours</b>                                                             | <b>Barriers</b>                                                                                                                                                                                                                                                                                                                                                                                                                                                                                                                                                                                                                           | <b>Enablers</b>                                                                                                                                                                                                                                                                                                                                                                                                                                            |
|----------------------------------------------------------------------------------------|-------------------------------------------------------------------------------------------------------------------------------------------------------------------------------------------------------------------------------------------------------------------------------------------------------------------------------------------------------------------------------------------------------------------------------------------------------------------------------------------------------------------------------------------------------------------------------------------------------------------------------------------|------------------------------------------------------------------------------------------------------------------------------------------------------------------------------------------------------------------------------------------------------------------------------------------------------------------------------------------------------------------------------------------------------------------------------------------------------------|
| Refer for pathology testing                                                            | <ul style="list-style-type: none"> <li>- None cited</li> </ul>                                                                                                                                                                                                                                                                                                                                                                                                                                                                                                                                                                            | <ul style="list-style-type: none"> <li>- Believe pathology necessary to rule out other possible causes of dementia-like symptoms</li> <li>- Pathology required to refer patient to specialist/CDAMS</li> <li>- Pathology services easily accessible</li> <li>- Pathology testing a routine procedure</li> </ul>                                                                                                                                            |
| Refer for head/brain CT scan                                                           | <ul style="list-style-type: none"> <li>- Believe brain CT not necessary/helpful for all patients</li> <li>- Believe brain CT not needed to refer patient to specialist/CDAMS</li> <li>- Not aware brain CT should form part of the diagnostic work up of patients with suspected dementia</li> <li>- Difficult for patients to access CT facilities</li> </ul>                                                                                                                                                                                                                                                                            | <ul style="list-style-type: none"> <li>- Brain CT needed to refer patient to specialist/CDAMS</li> <li>- Able to access CT facilities</li> <li>- Believe brain CT useful/necessary to rule out other conditions</li> <li>- Brain CT helps to define type of dementia</li> </ul>                                                                                                                                                                            |
| Review current medication                                                              | <ul style="list-style-type: none"> <li>- Complicated medication regimen requires pharmacist review</li> <li>- Doesn't believe review of medication is part of diagnostic work up of suspected dementia</li> </ul>                                                                                                                                                                                                                                                                                                                                                                                                                         | <ul style="list-style-type: none"> <li>- Aware some medications affect cognitive function</li> <li>- Believe review of current medication is part of diagnostic work up of suspected dementia</li> <li>- Reviewing medications is a routine procedure</li> </ul>                                                                                                                                                                                           |
| Disclose or reinforce a diagnosis of dementia                                          | <ul style="list-style-type: none"> <li>- Uncomfortable discussing issue</li> <li>- Not wish to upset the patient</li> <li>- Believe labelling the disease not important</li> <li>- Believe some patients find label confronting/stigmatising</li> <li>- Believe some patients not able to understand diagnosis</li> <li>- Believe more important for carer to know than patient</li> </ul>                                                                                                                                                                                                                                                | <ul style="list-style-type: none"> <li>- Believe important to be honest with patients about their diagnosis</li> <li>- Have a responsibility to patient to disclose the diagnosis</li> <li>- Comfortable discussing issue</li> <li>- Believe patient is aware of the diagnosis (due to consultation with specialist) so shouldn't avoid talking about it</li> <li>- Believe patient (and carer) need to know so they can prepare for the future</li> </ul> |
| Refer to specialist (including via CDAMS) for access to dementia-modifying medications | <ul style="list-style-type: none"> <li>- Patient's other medical conditions considered a higher priority; patient too ill for other treatment</li> <li>- Cognitive impairment level not considered sufficient to be eligible for medication</li> <li>- GP believes the medication is not particularly effective</li> <li>- Difficulty accessing CDAMS/specialist (for review and commencement of medication)</li> <li>- Patient/carers refusal</li> <li>- Refer only in instances where patients believed to have Alzheimer's dementia</li> <li>- Formal diagnosis considered unnecessary and won't affect patients management</li> </ul> | <ul style="list-style-type: none"> <li>- Need for specialist authorisation to access medication</li> <li>- Need for confirmation of diagnosis</li> <li>- Desire to access support services provided/coordinated by CDAMS/specialist referral (e.g. care packages, respite, carer support)</li> <li>- Able to access CDAMS/specialist</li> <li>- Patient/carers request for specialist review</li> </ul>                                                    |

|                                                                                                    |                                                                                                                                                                                                                                                                                                                                                                                                                                                                                                                                                                                                                                                                           |                                                                                                                                                                                                                                                                                                                                                             |
|----------------------------------------------------------------------------------------------------|---------------------------------------------------------------------------------------------------------------------------------------------------------------------------------------------------------------------------------------------------------------------------------------------------------------------------------------------------------------------------------------------------------------------------------------------------------------------------------------------------------------------------------------------------------------------------------------------------------------------------------------------------------------------------|-------------------------------------------------------------------------------------------------------------------------------------------------------------------------------------------------------------------------------------------------------------------------------------------------------------------------------------------------------------|
| Provide information on, or refer for, recreational and activities to promote cognitive stimulation | <ul style="list-style-type: none"> <li>- Believe this is done by others (e.g. CDAMS, ACAS, specialist recommends information or refers patients and carers)</li> <li>- Believe patients/carers will organise</li> <li>- Believe not all patients interested</li> <li>- Consider some patients incapable of doing such activities</li> <li>- Only when requested or believe needed</li> <li>- Not aware of what available/appropriate</li> <li>- Forget to do</li> <li>- Believe patient already undertaking cognitive/recreational activities</li> </ul>                                                                                                                  | <ul style="list-style-type: none"> <li>- Routine management for patients with dementia and their carers</li> <li>- Routine management for older patients</li> <li>- Believe beneficial for patients and carers (effects for patients with dementia; respite for carer)</li> <li>- Aware of programmes/activities available and appropriate</li> </ul>       |
| Provide, or refer for, caregiver training                                                          | <ul style="list-style-type: none"> <li>- GP believes CDAMS/specialist organises or refers carer to appropriate place</li> <li>- GP believes carer has organised/will organise if required</li> <li>- Not aware that formal training programmes available</li> <li>- Only recommends when requested by carer or believes needed</li> <li>- Forgets/doesn't think to do</li> <li>- GP believes many carers not interested</li> <li>- Carer refusal</li> </ul>                                                                                                                                                                                                               | <ul style="list-style-type: none"> <li>- GP aware of training programmes (e.g. Alzheimer's Australia)</li> <li>- Believes programmes are beneficial</li> </ul>                                                                                                                                                                                              |
| Promote awareness of changing driving capacity as disease progresses                               | <ul style="list-style-type: none"> <li>- Believe inability to drive causes practical difficulties for patients, especially in country areas (e.g. shopping, accessing appointments) and emotional/social impacts (e.g. loss of independence, social isolation), so possible risk has to be weighed against these</li> <li>- Considers it a difficult issue to deal with so avoids as long as possible</li> <li>- Considers low risk if patient continues driving (esp. in early stages)</li> <li>- Concerned about effect on doctor-patient relationship if GP seen to be involved</li> <li>- Believe GPs shouldn't be responsible for dealing with this issue</li> </ul> | <ul style="list-style-type: none"> <li>- Important issue that needs to be dealt with</li> <li>- Concern about the risk to patients and others</li> <li>- Believe role of GP to deal with this issue</li> <li>- While inability to drive may cause difficulties for patients, considers it more important to respond to changing driving capacity</li> </ul> |
| Discuss legal issues                                                                               | <ul style="list-style-type: none"> <li>- Believe this is dealt with by others (e.g. CDAMS, ACAS)</li> <li>- Considers it a difficult issue so avoids if possible</li> <li>- Believe doesn't have the knowledge/skills/experience to deal with this issue</li> <li>- Believe once dementia diagnosis made it is too late to deal with these issues; they need to be done beforehand</li> </ul>                                                                                                                                                                                                                                                                             | <ul style="list-style-type: none"> <li>- Important issue that needs to be dealt with</li> <li>- Believe will cause problems later for patient, carer and GP if not dealt with</li> <li>- Believe it is GPs' role to discuss</li> <li>- Refers to appropriate sources to organise if GP doesn't have sufficient knowledge/skills</li> </ul>                  |

|  |                                                                                                                                                 |  |
|--|-------------------------------------------------------------------------------------------------------------------------------------------------|--|
|  | <ul style="list-style-type: none"><li>- Not think to raise issue</li><li>- Believe patients/carers usually deal with issue themselves</li></ul> |  |
|--|-------------------------------------------------------------------------------------------------------------------------------------------------|--|
